# Supplementary material
Source: PubMed Central journal article supplement (PMC1299271)
Supplement: 6-7400361s1.pdf [file 6-7400361s1.pdf]

## Tsutsui et al., Supplementary Information

**The residues for site-directed random mutagenesis on KikG/D62H** were Met<sup>10</sup> and Leu<sup>12</sup> (1<sup>st</sup> strand); Gly<sup>27</sup> and Gly<sup>29</sup> (2<sup>nd</sup> strand); Gln<sup>38</sup> and Met<sup>40</sup> (3<sup>rd</sup> strand); Tyr<sup>87</sup> and Trp<sup>89</sup> (4<sup>th</sup> strand); Asn<sup>105</sup> and Ile<sup>107</sup> (5<sup>th</sup> strand); Tyr<sup>119</sup> and Ile<sup>121</sup> (6<sup>th</sup> strand); Ser<sup>145</sup> and Glu<sup>147</sup> (7<sup>th</sup> strand); Val<sup>160</sup> and Met<sup>162</sup> (8<sup>th</sup> strand); Phe<sup>176</sup> and Thr<sup>178</sup> (9<sup>th</sup> strand); His<sup>196</sup> and Ile<sup>198</sup> (10<sup>th</sup> strand); and Leu<sup>212</sup> and Glu<sup>214</sup> (11<sup>th</sup> strand).

### Data collection and refinement statistics table

---

#### Data collection statistics

|                                   |                                    |
|-----------------------------------|------------------------------------|
| Space group                       | C2                                 |
| Wavelength (Å)                    | 0.7                                |
| Unit cell dimensions (Å)          | a=96.7; b=119.1; c=49.3; β=120.72° |
| Resolution range (Å) <sup>a</sup> | 100-1.6 (1.69-1.60)                |
| Number of observations            | 203807                             |
| Number of unique reflections      | 53570                              |
| Completeness (%) <sup>a</sup>     | 95.0 (94.0)                        |
| R sym (%) <sup>ab</sup>           | 7.2 (12.5)                         |
| Mean I / σ (%) <sup>a</sup>       | 5.9 (4.3)                          |

#### Refinement statistics

|                                     |         |
|-------------------------------------|---------|
| Resolution range for refinement (Å) | 100-1.6 |
| R work (%) <sup>b</sup>             | 19.7    |
| R free (%) <sup>b</sup>             | 22.9    |
| R.m.s. deviations from ideal        |         |
| Bond length (Å)                     | 0.005   |
| Bond angle (degree)                 | 1.4     |
| Average B-factor (Å <sup>2</sup> )  | 15.8    |
| Number of water molecules           | 573     |

---

<sup>a</sup> Values in parentheses are for the highest-resolution shell.

<sup>b</sup>  $R \text{ sym} = \sum (|I_{hkl} - I_{\langle hkl \rangle}|) / (I_{hkl})$ , where  $I_{\langle hkl \rangle}$  is the mean intensity of all reflections equivalent to reflection  $hkl$  by symmetry;  $R \text{ work} (R \text{ free}) = \sum ||F_o| - |F_c|| / \sum |F_o|$ ; 5% of data were used for  $R \text{ free}$ .

**Figure S1. Division of highlighted cells**

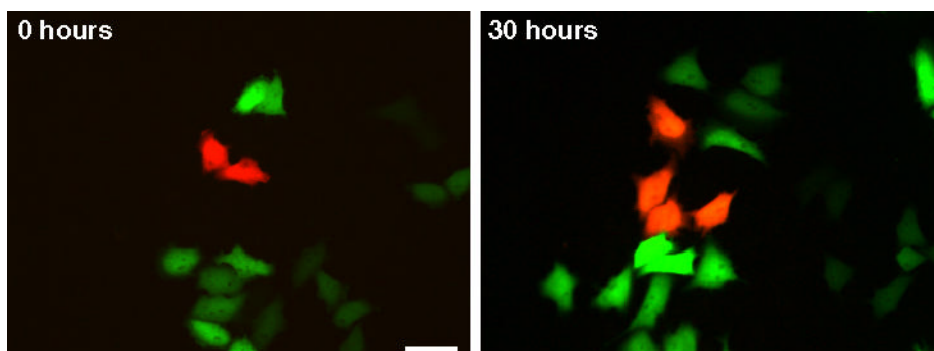

Among HeLa cells expressing KikGR, two were photoconverted to provide maximum green/red contrast. Both the cells underwent normal cell division, ensuring insignificant toxicity of cell labeling by KikGR photoconversion (Scale, 50  $\mu\text{m}$ ).

**Table S1. Protein expression and folding efficiencies of KikGR and Kaede in mammalian cells.**

---

|                          | Kaede (*16,120 pixels) | KikGR(*21,439 pixels) |
|--------------------------|------------------------|-----------------------|
| Myc-tag intensity [a.u.] | $310 \pm 6.24$         | $715 \pm 6.75$        |
| Green intensity [a.u.]   | $236 \pm 10.2$         | $660 \pm 9.65$        |
| Green/myc [a.u.]         | $1.75 \pm 0.063$       | $2.46 \pm 0.046$      |

---

\*Number of pixels comprising the cells and quantified.

HeLa cells were transfected with the cDNA for C-terminal myc-tagged KikGR or Kaede. After 24 hours, cells were fixed and subject to immunocytochemistry using anti-myc antibody conjugated with Alexa583. Total and fluorescent proteins were quantified by measuring fluorescence intensities at 583 and 517 nm, respectively. Folding efficiency was estimated as the ratio of 517 / 583 nm. Data are presented as mean  $\pm$  standard error.
